# Supplementary material for: Ab initio molecular dynamics simulations of liquid water using high quality meta-GGA functionals
Source: PubMed Central journal article supplement (PMC6092720; doi:10.1039/c6sc04711d), 2017-02-27
Supplement: SC-008-C6SC04711D-s001.pdf [file SC-008-C6SC04711D-s001.pdf]

## Supplementary Information for

# Ab Initio Molecular Dynamics Simulations of Liquid Water using High Quality Meta-GGA Functionals

Luis Ruiz Pestana<sup>1</sup>, Narbe Mardirossian<sup>2</sup>, Martin Head-Gordon<sup>2</sup>, Teresa Head-Gordon<sup>1,3</sup>

### 1. Validation of the meta-GGA implementation in the CP2K code.

Our original interest in examining the meta-GGA functionals were motivated by their very good performance in reproducing a wide range of high quality reference data<sup>1, 2</sup>. Therefore an important validation step is to ensure that implementation of these functionals through LIBXC<sup>3</sup> in the CP2K code, that uses the mixed Gaussian and plane waves (GPW) approach with pseudopotentials (PPs), is in sufficient agreement with the all-electron reference wavefunction calculation in the Q-Chem software package<sup>4</sup>. For this purpose, we analyze the errors in the binding energies by the different methodologies of the dimers in the S22<sup>5</sup> dataset (recently updated<sup>6</sup>) that contains 8 dispersion-bound, 7 hydrogen-bonded, and 7 mixed non-covalent interactions.

To assess the PP error, we compare the all-electron wavefunction method implemented in Q-Chem, the Gaussian augmented plane wave (GAPW) all-electron method<sup>7</sup> implemented in CP2K, and the Gaussian plane wave (GPW) pseudopotential method also implemented in CP2K, for the revPBE-D3 functional (Table S1). For the GPW calculations we employ Goedecker-Teter-Hutter (GTH) pseudopotentials<sup>8, 9</sup>, in particular the GTH PP optimized for the functional PBE, PBE-PP. Because the D3 corrections that we apply to revPBE and M06-L are with zero-damping<sup>10</sup>, in the following, we refer to those simply as D3, instead of the alternative D3(0) notation. The basis set (BS) aug-cc-pVTZ was used for the Q-Chem and GAPW calculations, and the aug-QZV3P for the GPW calculations. We determined a mean absolute error (MAE) of 0.048 kcal/mol between GAPW and Q-Chem, which rises to 0.136 kcal/mol for GPW. This error of  $\sim 0.1k_B T$  is likely the best that any density functional can be represented by plane waves, and furthermore we believe is acceptable for our intended study in the bulk phase.

Next we compared the GPW performance of B97M-rV and M06-L-D3, against all electron Q-Chem benchmark calculations (Table S2). In these GPW calculations we use a plane

wave energy cutoff ( $E_{\text{cut}}$ ) of 1200 Ry, an aug-QZV3P BS, and the PBE-PP for both meta-GGAs. The mean signed error (MSE) is very small, just 0.07 kcal/mol and -0.05 kcal/mol for M06-L-D3 and B97M-rV respectively. This result suggests, first, that the GPW representation of the meta-GGAs using large  $E_{\text{cut}}$  and large BS is very accurate, and second, that the error introduced by a PP that was not explicitly optimized for each specific functional is very small.

To further prove the latter point, we have compared the binding and relative energies of the complexes in the WATER20 dataset<sup>11</sup> for the functional M06-L-D3 using the PBE-PP and an optimized PP that we obtained following an optimization procedure available in CP2K (Table S3). We observe that the difference between both PPs in the relative energies is negligible. However, the optimized PP results in substantially larger errors in the binding energies. A closer look reveals a shift of the optimized PP of  $\sim 5$  kcal/mol in the binding energies with respect to the PBE-PP. This shift is in the wrong direction, which ultimately translates in higher values of the MSE and RMSE. In all the simulations presented in the manuscript we have used the PBE-GTH-PP for all the functionals. Together, these benchmarks allow us to proceed with some confidence in examining the behavior of the functionals in the condensed phase.

## **2. Validation of the three functionals under conditions relevant for the condensed phase.**

Although the meta-GGA functionals M06-L-D3 and B97M-rV were developed, optimized, and intended for refined DFT grids and large BS, the condensed phase simulations using the GPW approach are run under significantly different protocols, such as BS of moderate size and tractable  $E_{\text{cut}}$ . To gain further insight into the performance of the meta-GGAs and revPBE-D3 under such conditions, we calculate the errors in the binding energies of the S22<sup>5</sup> and WATER20<sup>11</sup> data sets, and compare them to the errors from Q-Chem calculations, where the def2-QZVPPD basis set is used without counterpoise corrections, along with a (99,590) grid for local exchange-correlation functionals and the SG-1 grid for the VV10 nonlocal correlation functional<sup>12</sup>. It is worth noting that we use updated reference values for both data sets<sup>6, 13</sup>. In the GPW calculations we use mDZVP or mTZV2P, and  $E_{\text{cut}}=400$  Ry or  $E_{\text{cut}}=800$  Ry, which are representative of our simulations in the NVT/NVE and NpT ensembles, respectively.

In Table S3 we evaluate the root mean-squared error (RMSE) and mean signed percentage error (MSPE) of the binding energies for the S22 dataset. According to our convention in the MSPE, positive values indicate over-binding with respect to the reference, while negative values indicate under-binding. The MSPE reflect a consistent trend expected from the basis set superposition

error (BSSE), i.e. any under-binding exhibited by the benchmark systematically improves with the smaller basis sets used in the GPW protocol, whereas any over-binding gets worse in the GPW implementation with typical condensed phase settings. In this regard, revPBE-D3 that has already a tendency to overbind degrades, whereas the MSPE in the meta-GGAs either substantially improve (M06-L-D3) or show minor shifts from small under-binding to small over-binding (B97M-rV). The overall errors do not appear to be sensitive to either BS or  $E_{\text{cut}}$ .

In the case of WATER20 shown in Table S4, the RMSE are considerably larger because the typical binding energies of the water clusters are an order of magnitude larger than those of the small complexes in the S22 dataset. In contrast to the S22 dataset, here both BS and  $E_{\text{cut}}$  play an important role, with larger BS and higher cutoffs leading to smaller errors, as expected. Interestingly, for mTZV2P and  $E_{\text{cut}}=800$  Ry (the most accurate settings employed), the three functionals outperform the Q-Chem benchmarks, indicating that results from NpT simulations where we use those settings will not be strongly compromised by the condensed phase settings. By contrast, the mTZV2P and  $E_{\text{cut}}=400$  Ry, which are the settings that we use to calculate properties such as radial distribution functions, vibrational spectra, and diffusion constant from AIMD simulations in the NVT or NVE ensembles, improve for revPBE-D3, but degrade significantly M06-L-D3, which appears to be very sensitive to  $E_{\text{cut}}$ .

Even so, binding energies may be a poor choice for validation for properties in the condensed phase, and so we also benchmark against the relative energies of isomerization for the WATER20 dataset in Table S5. Overall, the differences in errors between the Q-Chem and GPW are small. The grid sensitivity of M06-L-D3 is exposed again, where for example for mTZV2P, the RMSE increases from 2.78 to 4.18 (and the MSE from 0.84 to 1.74) going from 800 to 400 Ry.

### **3. Validation of the procedure for calculating the density in the NPT ensemble.**

As discussed in the Methods section, constant pressure molecular dynamics simulations that rely on the calculation of the pressure virial have been reported to be particularly sensitive to BS and  $E_{\text{cut}}$ <sup>14, 15</sup>. We have studied the equilibrium density of water using revPBE-D3, the more affordable functional, for two different basis sets (mTZV2P and mDZVP) and in the mTZV2P case, for two different cutoffs: 1700 Ry and 800 Ry. Only the simulation with the highest cutoff and larger basis set (blue line in Figure S1) converges in the limited simulation time.

The density for revPBE-D3 with mTZV2P and 1700 Ry is 0.93 g/cm<sup>3</sup>, in good agreement with previous studies (~0.95 g/cm<sup>3</sup>). Although the pressure fluctuations are large (in the order of 7.5 kbar) due to the small system size, the average converges well to the applied external pressure of 1 atm (inset in Figure S1), in agreement with the virial theorem<sup>16</sup>. These pressure fluctuations are similar to those measured in other NpT simulations of ab-initio water performed using converged discrete variable representation basis sets and the functional BLYP<sup>17</sup>. Due to difficulties in the computational implementation, AIMD simulations in the NpT ensemble are not feasible for meta-GGAs in CP2K. For this reason, we use ab initio hybrid Monte Carlo (AI-HMC) as an alternative, possibly better method, to find the equilibrium density. We observe that the density of 0.97 g/cm<sup>3</sup> from AI-HMC (Figure 5) is in reasonable agreement with our AIMD-NpT simulation result of 0.93 g/cm<sup>3</sup>, given the errors involved in the calculation. We have also calculated the density using the same BS and E<sub>cut</sub> than for the isochoric simulations, and the results are also shown in Figure 5. We find that the equilibrium density shifts very slightly (~0.02 g/cm<sup>3</sup>) towards smaller values for all the functionals.

**Table S1.** Binding energies and mean absolute errors (MAE) for the different implementations of the revPBE-D3 functional evaluated on the S22 dataset. We compare results from all-electron Q-Chem calculation using an aug-cc-pVTZ basis set, all-electron (all-e) CP2K calculations using the aug-cc-pVTZ basis set, and pseudopotential (PP) CP2K calculations using the aug-QZV3P basis set. The units are kcal/mol.

| <b>S22 complex</b>                                           | <b>Q-Chem</b> | <b>CP2K (all-e)</b> | <b>CP2K (PP)</b> |
|--------------------------------------------------------------|---------------|---------------------|------------------|
| <b>Hydrogen-bonded</b>                                       |               |                     |                  |
| NH <sub>3</sub> dimer                                        | -3.40         | -3.38               | -3.42            |
| H <sub>2</sub> O dimer                                       | -5.40         | -5.40               | -5.51            |
| Formic acid dimer                                            | -19.78        | -19.75              | -19.68           |
| Formamide dimer                                              | -16.47        | -16.35              | -16.33           |
| Uracil dimer (planar)                                        | -21.02        | -20.75              | -20.59           |
| 2-pyridone2-aminopyridine                                    | -18.23        | -18.15              | -18.05           |
| Adeninethymine WC                                            | -17.54        | -17.29              | -17.13           |
| <b>Dispersion-bound</b>                                      |               |                     |                  |
| CH <sub>4</sub> dimer                                        | -0.83         | -0.83               | -0.80            |
| C <sub>2</sub> H <sub>4</sub> dimer                          | -1.69         | -1.69               | -1.65            |
| Benzene-CH <sub>4</sub>                                      | -1.65         | -1.65               | -1.58            |
| Benzene dimer (parallel)                                     | -2.53         | -2.53               | -2.37            |
| Pyrazine dimer                                               | -3.72         | -3.73               | -3.57            |
| Uracil dimer (stacked)                                       | -9.33         | -9.24               | -9.02            |
| Indolebenzene                                                | -3.93         | -3.92               | -3.69            |
| Adeninethymine                                               | -10.20        | -10.14              | -9.84            |
| <b>Mixed complexes</b>                                       |               |                     |                  |
| C <sub>2</sub> H <sub>4</sub> -C <sub>2</sub> H <sub>2</sub> | -1.96         | -1.96               | -1.94            |
| Benzene-H <sub>2</sub> O                                     | -3.67         | -3.67               | -3.68            |
| Benzene-NH <sub>3</sub>                                      | -2.61         | -2.61               | -2.58            |
| Benzene-HCN                                                  | -4.64         | -4.65               | -4.62            |
| Benzene dimer (t-shaped)                                     | -2.80         | -2.81               | -2.72            |
| Indolebenzene                                                | -5.68         | -5.71               | -5.62            |
| Phenol dimer                                                 | -6.94         | -6.99               | -6.90            |
| <b>MAE wrt Q-Chem</b>                                        |               | <b>0.048</b>        | <b>0.136</b>     |
| <b>MAE wrt CP2K all-e</b>                                    |               |                     | <b>0.101</b>     |

**Table S2.** Binding energies and mean signed errors (MSE) of the S22 dataset for B97M-rV and M06-L-D3. The MSE is calculated between CP2K results (1200 Ry, aug-QZV3P, GTH-PP) and all-electron Q-Chem calculations (def2-QZVPPD without counterpoise corrections). The units are kcal/mol.

| S22 complex                                                  | B97M-rV |               | M06-L-D3 |              |
|--------------------------------------------------------------|---------|---------------|----------|--------------|
|                                                              | Q-Chem  | CP2K          | Q-Chem   | CP2K         |
| <b>Hydrogen-bonded</b>                                       |         |               |          |              |
| NH <sub>3</sub> dimer                                        | -3.14   | -3.14         | -2.75    | -2.76        |
| H <sub>2</sub> O dimer                                       | -5.03   | -5.03         | -4.69    | -4.79        |
| Formic acid dimer                                            | -18.79  | -18.34        | -19.08   | -19.20       |
| Formamide dimer                                              | -15.74  | -15.50        | -15.83   | -15.95       |
| Uracil dimer (planar)                                        | -20.26  | -20.08        | -19.67   | -20.00       |
| 2-pyridone2-aminopyridine                                    | -16.56  | -16.46        | -16.66   | -16.92       |
| Adeninethymine WC                                            | -16.02  | -15.94        | -15.83   | -16.11       |
| <b>Dispersion-bound</b>                                      |         |               |          |              |
| CH <sub>4</sub> dimer                                        | -0.46   | -0.47         | -0.55    | -0.44        |
| C <sub>2</sub> H <sub>4</sub> dimer                          | -1.38   | -1.42         | -1.29    | -1.20        |
| Benzene-CH <sub>4</sub>                                      | -1.43   | -1.47         | -1.12    | -1.00        |
| Benzene dimer (parallel)                                     | -2.80   | -2.92         | -2.75    | -2.41        |
| Pyrazine dimer                                               | -4.14   | -4.22         | -3.82    | -3.49        |
| Uracil dimer (stacked)                                       | -10.19  | -10.42        | -9.59    | -9.17        |
| Indolebenzene                                                | -4.74   | -4.98         | -4.53    | -4.12        |
| Adeninethymine                                               | -12.35  | -12.69        | -11.90   | -11.44       |
| <b>Mixed complexes</b>                                       |         |               |          |              |
| C <sub>2</sub> H <sub>4</sub> -C <sub>2</sub> H <sub>2</sub> | -1.55   | -1.67         | -1.07    | -1.07        |
| Benzene-H <sub>2</sub> O                                     | -3.21   | -3.31         | -2.97    | -2.76        |
| Benzene-NH <sub>3</sub>                                      | -2.25   | -2.31         | -2.01    | -1.84        |
| Benzene-HCN                                                  | -4.33   | -4.55         | -3.87    | -3.84        |
| Benzene dimer (t-shaped)                                     | -2.49   | -2.70         | -2.18    | -2.09        |
| Indolebenzene                                                | -5.24   | -5.57         | -4.77    | -4.76        |
| Phenol dimer                                                 | -6.75   | -6.84         | -6.44    | -6.40        |
| <b>MSE wrt Q-Chem</b>                                        |         | <b>-0.054</b> |          | <b>0.073</b> |

**Table S3.** Root mean-squared error (RMSE) and mean signed error (MSE) of the binding and relative energies of the WATER20 dataset by the functional M06-L-D3, used with two different GTH pseudopotentials: PBE-PP and a functional-optimized PP. The units are kcal/mol.

| BS     | $E_{\text{cut}}$ (Ry) | Binding energies |        |              |        | Relative energies |      |              |      |
|--------|-----------------------|------------------|--------|--------------|--------|-------------------|------|--------------|------|
|        |                       | PBE-PP           |        | Optimized PP |        | PBE-PP            |      | Optimized PP |      |
|        |                       | RMSE             | MSE    | RMSE         | MSE    | RMSE              | MSE  | RMSE         | MSE  |
| mDZVP  | 400                   | 16.27            | -15.64 | 21.61        | -21.16 | 4.98              | 2.14 | 4.91         | 2.27 |
| mDZVP  | 800                   | 4.56             | -2.88  | 8.83         | -8.15  | 3.72              | 1.18 | 3.62         | 1.31 |
| mTZV2P | 400                   | 11.58            | -10.94 | 17.11        | -16.70 | 4.18              | 1.74 | 4.15         | 1.86 |
| mTZV2P | 800                   | 3.32             | 1.99   | 4.31         | -3.48  | 2.78              | 0.84 | 2.72         | 0.97 |

**Table S4.** Root mean-squared error (RMSE) and mean signed percentage error (MSPE) of the S22 dataset binding energies. The mTZV2P and 400 Ry red-shaded row corresponds to the settings that were used for the AIMD simulations in the NVT and NVE ensembles. The mTZV2P and 800 Ry blue-shaded row corresponds to the settings employed in the AI-HMC simulations. The units are kcal/mol.

| BS            | $E_{\text{cut}}$ (Ry) | revPBE-D3 |       | B97M-rV |        | M06-L-D3 |        |
|---------------|-----------------------|-----------|-------|---------|--------|----------|--------|
|               |                       | RMSE      | MSPE  | RMSE    | MSPE   | RMSE     | MSPE   |
| mDZVP         | 400                   | 0.49      | 4.84% | 0.43    | 2.80%  | 0.54     | 0.51%  |
| mDZVP         | 800                   | 0.47      | 5.51% | 0.44    | 3.21%  | 0.56     | 1.53%  |
| mTZV2P        | 400                   | 0.52      | 5.48% | 0.44    | 1.34%  | 0.54     | 1.65%  |
| mTZV2P        | 800                   | 0.49      | 6.15% | 0.44    | 1.72%  | 0.55     | 2.62%  |
| <b>Q-Chem</b> |                       | 0.61      | 2.50% | 0.29    | -1.72% | 0.47     | -7.96% |

**Table S5.** Root mean-squared error (RMSE) and mean signed percentage error (MSPE) of the WATER20 dataset binding energies. The mTZV2P and 400 Ry red-shaded row corresponds to the settings that were used for the AIMD simulations in the NVT and NVE ensembles. The mTZV2P and 800 Ry blue-shaded row corresponds to the settings employed in the AI-HMC simulations. The units are kcal/mol.

| BS            | $E_{\text{cut}}$ (Ry) | revPBE-D3 |        | B97M-rV |        | M06-L-D3 |        |
|---------------|-----------------------|-----------|--------|---------|--------|----------|--------|
|               |                       | RMSE      | MSPE   | RMSE    | MSPE   | RMSE     | MSPE   |
| mDZVP         | 400                   | 3.80      | 1.68%  | 6.25    | 3.00%  | 16.27    | 7.56%  |
| mDZVP         | 800                   | 4.22      | 1.96%  | 4.81    | 2.28%  | 4.56     | 1.36%  |
| mTZV2P        | 400                   | 3.03      | -1.12% | 2.80    | 1.30%  | 11.58    | 5.29%  |
| mTZV2P        | 800                   | 2.34      | -0.83% | 1.53    | 0.65%  | 3.32     | -0.99% |
| <b>Q-Chem</b> |                       | 9.70      | -4.66% | 1.64    | -0.74% | 4.15     | -1.44% |

**Table S6.** Root mean-squared error (RMSE) and mean signed error (MSE) of the WATER20 dataset relative energies. The mTZV2P and 400 Ry red-shaded row corresponds to the settings that were used for the AIMD simulations in the NVT and NVE ensembles. The mTZV2P and 800 Ry blue-shaded row corresponds to the settings employed in the AI-HMC simulations. The units are kcal/mol.

| BS            | $E_{\text{cut}}$ (Ry) | revPBE-D3 |       | B97M-rV |       | M06-L-D3 |      |
|---------------|-----------------------|-----------|-------|---------|-------|----------|------|
|               |                       | RMSE      | MSE   | RMSE    | MSE   | RMSE     | MSE  |
| mDZVP         | 400                   | 1.94      | -1.02 | 1.07    | -0.57 | 4.98     | 2.14 |
| mDZVP         | 800                   | 1.48      | -0.72 | 0.99    | -0.28 | 3.72     | 1.18 |
| mTZV2P        | 400                   | 2.22      | -1.12 | 1.13    | -0.75 | 4.18     | 1.74 |
| mTZV2P        | 800                   | 1.77      | -0.82 | 0.87    | -0.47 | 2.78     | 0.84 |
| <b>Q-Chem</b> |                       | 1.31      | -0.56 | 0.64    | -0.16 | 3.01     | 0.52 |



**Table S7.** *Vibrational frequencies of water clusters from the dimer ( $n = 2$ ) to the hexamer ( $n = 6$ ) calculated in Q-Chem with the def2-QZVPPD basis set and a (250,974) grid. The modes are separated in hydrogen bonded-OH stretch (BS), free-OH stretch (FS), angle bend (AB), and librational modes (LM), which include all the modes with frequencies  $< 1000 \text{ cm}^{-1}$ . The units are  $\text{cm}^{-1}$ . For the eight water clusters, full geometry optimizations were carried out with each functional, followed by a harmonic frequency calculation (using  $6N$ -atoms analytic gradient calculations to compute the Hessian via finite difference). The geometry optimizations were carried out until the maximum gradient component was smaller than  $50 \times 10^{-6}$ , and either the maximum atomic displacement was smaller than  $50 \times 10^{-6}$  a.u. or the absolute energy change was smaller than  $50 \times 10^{-8}$  Eh. The def2-QZVPPD basis set (132 basis functions per water molecule) was used for the frequency calculations, along with a (250,974) integration grid (250 radial shells with 974 grid points per shell) for local exchange-correlation functionals, and the SG-1 integration grid for the VV10 nonlocal correlation functional. The basis set and integration grid were chosen after carrying out extensive tests on the water dimer using eight different basis sets (aug-cc-pVDZ, aug-cc-pVTZ, aug-cc-pVQZ, aug-pc-1, aug-pc-2, aug-pc-3, pc-3, def2-QZVPPD) and four different integration grids ((75,302), (99,590), (250,974), (500,1454)) with all three functionals. The def2-QZVPPD/(250,974) combination was chosen as it was the most economical choice that resulted in a maximum absolute error of  $5 \text{ cm}^{-1}$  with respect to aug-pc-3/(500,1454) for the 12 vibrational modes of the water dimer, for all three functionals.*

| <i>n</i> | Name   | Mode | Ref. <sup>18</sup> | B97M-rV | M06-L-D3 | revPBE-D3 |
|----------|--------|------|--------------------|---------|----------|-----------|
| 2        | dimer  | LM   | 126                | 126     | 137      | 119       |
| 2        | dimer  | LM   | 143                | 142     | 151      | 150       |
| 2        | dimer  | LM   | 149                | 151     | 163      | 157       |
| 2        | dimer  | LM   | 185                | 186     | 198      | 171       |
| 2        | dimer  | LM   | 348                | 353     | 369      | 365       |
| 2        | dimer  | LM   | 614                | 602     | 628      | 592       |
| 2        | dimer  | AB   | 1651               | 1687    | 1671     | 1604      |
| 2        | dimer  | AB   | 1671               | 1703    | 1689     | 1620      |
| 2        | dimer  | BS   | 3751               | 3757    | 3723     | 3584      |
| 2        | dimer  | FS   | 3827               | 3846    | 3841     | 3695      |
| 2        | dimer  | FS   | 3913               | 3930    | 3933     | 3774      |
| 2        | dimer  | FS   | 3933               | 3950    | 3955     | 3796      |
| 3        | trimer | LM   | 167                | 173     | 186      | 156       |
| 3        | trimer | LM   | 179                | 179     | 189      | 164       |
| 3        | trimer | LM   | 188                | 191     | 204      | 185       |
| 3        | trimer | LM   | 196                | 200     | 210      | 201       |
| 3        | trimer | LM   | 220                | 218     | 231      | 210       |
| 3        | trimer | LM   | 234                | 243     | 250      | 246       |
| 3        | trimer | LM   | 337                | 332     | 344      | 339       |
| 3        | trimer | LM   | 349                | 344     | 358      | 356       |
| 3        | trimer | LM   | 437                | 433     | 448      | 434       |
| 3        | trimer | LM   | 561                | 554     | 576      | 553       |
| 3        | trimer | LM   | 655                | 638     | 659      | 626       |
| 3        | trimer | LM   | 844                | 846     | 886      | 862       |
| 3        | trimer | AB   | 1660               | 1691    | 1676     | 1612      |

|       |          |    |      |      |      |      |
|-------|----------|----|------|------|------|------|
| 3     | trimer   | AB | 1663 | 1693 | 1679 | 1616 |
| 3     | trimer   | AB | 1685 | 1712 | 1698 | 1628 |
| 3     | trimer   | BS | 3627 | 3633 | 3574 | 3430 |
| 3     | trimer   | BS | 3683 | 3686 | 3639 | 3492 |
| 3     | trimer   | BS | 3691 | 3693 | 3648 | 3506 |
| 3     | trimer   | FS | 3904 | 3921 | 3921 | 3766 |
| 3     | trimer   | FS | 3908 | 3925 | 3925 | 3769 |
| 3     | trimer   | FS | 3908 | 3926 | 3926 | 3771 |
| <hr/> |          |    |      |      |      |      |
| 4     | tetramer | LM | 48   | 46   | 41   | 48   |
| 4     | tetramer | LM | 77   | 75   | 70   | 85   |
| 4     | tetramer | LM | 205  | 203  | 207  | 189  |
| 4     | tetramer | LM | 208  | 204  | 220  | 231  |
| 4     | tetramer | LM | 235  | 232  | 239  | 232  |
| 4     | tetramer | LM | 235  | 232  | 239  | 232  |
| 4     | tetramer | LM | 250  | 245  | 258  | 247  |
| 4     | tetramer | LM | 250  | 245  | 258  | 268  |
| 4     | tetramer | LM | 255  | 246  | 263  | 268  |
| 4     | tetramer | LM | 283  | 280  | 282  | 307  |
| 4     | tetramer | LM | 395  | 382  | 393  | 405  |
| 4     | tetramer | LM | 424  | 411  | 431  | 437  |
| 4     | tetramer | LM | 439  | 426  | 441  | 454  |
| 4     | tetramer | LM | 439  | 426  | 441  | 454  |
| 4     | tetramer | LM | 733  | 704  | 719  | 728  |
| 4     | tetramer | LM | 799  | 771  | 801  | 818  |
| 4     | tetramer | LM | 799  | 771  | 801  | 818  |
| 4     | tetramer | LM | 962  | 937  | 975  | 988  |
| 4     | tetramer | AB | 1666 | 1692 | 1676 | 1612 |
| 4     | tetramer | AB | 1678 | 1704 | 1689 | 1627 |
| 4     | tetramer | AB | 1678 | 1704 | 1689 | 1627 |
| 4     | tetramer | AB | 1704 | 1728 | 1715 | 1653 |
| 4     | tetramer | BS | 3472 | 3494 | 3415 | 3214 |
| 4     | tetramer | BS | 3557 | 3572 | 3507 | 3320 |
| 4     | tetramer | BS | 3557 | 3572 | 3507 | 3320 |
| 4     | tetramer | BS | 3591 | 3604 | 3543 | 3363 |
| 4     | tetramer | FS | 3899 | 3919 | 3920 | 3765 |
| 4     | tetramer | FS | 3899 | 3920 | 3921 | 3766 |
| 4     | tetramer | FS | 3899 | 3920 | 3921 | 3766 |
| 4     | tetramer | FS | 3900 | 3920 | 3922 | 3767 |
| <hr/> |          |    |      |      |      |      |
| 5     | pentamer | LM | 18   | 21   | 22   | 22   |
| 5     | pentamer | LM | 40   | 39   | 36   | 39   |
| 5     | pentamer | LM | 61   | 61   | 57   | 69   |
| 5     | pentamer | LM | 64   | 64   | 59   | 72   |
| 5     | pentamer | LM | 178  | 175  | 187  | 166  |
| 5     | pentamer | LM | 179  | 184  | 190  | 215  |
| 5     | pentamer | LM | 190  | 192  | 209  | 222  |
| 5     | pentamer | LM | 218  | 220  | 232  | 227  |

|       |          |    |      |      |      |      |
|-------|----------|----|------|------|------|------|
| 5     | pentamer | LM | 231  | 226  | 240  | 230  |
| 5     | pentamer | LM | 235  | 229  | 245  | 252  |
| 5     | pentamer | LM | 255  | 255  | 265  | 284  |
| 5     | pentamer | LM | 284  | 281  | 294  | 289  |
| 5     | pentamer | LM | 293  | 284  | 300  | 291  |
| 5     | pentamer | LM | 296  | 287  | 303  | 316  |
| 5     | pentamer | LM | 400  | 387  | 404  | 411  |
| 5     | pentamer | LM | 417  | 404  | 420  | 431  |
| 5     | pentamer | LM | 438  | 426  | 444  | 457  |
| 5     | pentamer | LM | 452  | 438  | 459  | 468  |
| 5     | pentamer | LM | 509  | 494  | 512  | 520  |
| 5     | pentamer | LM | 695  | 667  | 692  | 707  |
| 5     | pentamer | LM | 764  | 735  | 755  | 775  |
| 5     | pentamer | LM | 833  | 807  | 840  | 865  |
| 5     | pentamer | LM | 852  | 824  | 855  | 878  |
| 5     | pentamer | LM | 950  | 925  | 959  | 982  |
| 5     | pentamer | AB | 1669 | 1694 | 1679 | 1612 |
| 5     | pentamer | AB | 1678 | 1703 | 1689 | 1624 |
| 5     | pentamer | AB | 1688 | 1712 | 1698 | 1633 |
| 5     | pentamer | AB | 1704 | 1729 | 1717 | 1654 |
| 5     | pentamer | AB | 1711 | 1735 | 1723 | 1662 |
| 5     | pentamer | BS | 3441 | 3464 | 3385 | 3165 |
| 5     | pentamer | BS | 3514 | 3531 | 3464 | 3260 |
| 5     | pentamer | BS | 3522 | 3539 | 3471 | 3269 |
| 5     | pentamer | BS | 3562 | 3576 | 3515 | 3322 |
| 5     | pentamer | BS | 3569 | 3583 | 3521 | 3331 |
| 5     | pentamer | FS | 3898 | 3918 | 3921 | 3765 |
| 5     | pentamer | FS | 3900 | 3920 | 3922 | 3767 |
| 5     | pentamer | FS | 3902 | 3921 | 3924 | 3768 |
| 5     | pentamer | FS | 3903 | 3922 | 3925 | 3769 |
| 5     | pentamer | FS | 3904 | 3924 | 3926 | 3771 |
| <hr/> |          |    |      |      |      |      |
| 6     | ring     | LM | 28   | 27   | 26   | 25   |
| 6     | ring     | LM | 28   | 27   | 26   | 25   |
| 6     | ring     | LM | 45   | 45   | 46   | 46   |
| 6     | ring     | LM | 45   | 45   | 46   | 50   |
| 6     | ring     | LM | 50   | 49   | 47   | 50   |
| 6     | ring     | LM | 82   | 82   | 85   | 92   |
| 6     | ring     | LM | 156  | 153  | 163  | 145  |
| 6     | ring     | LM | 172  | 173  | 174  | 195  |
| 6     | ring     | LM | 195  | 198  | 201  | 206  |
| 6     | ring     | LM | 195  | 198  | 201  | 206  |
| 6     | ring     | LM | 211  | 205  | 218  | 222  |
| 6     | ring     | LM | 211  | 205  | 218  | 222  |
| 6     | ring     | LM | 254  | 255  | 262  | 282  |
| 6     | ring     | LM | 254  | 255  | 262  | 282  |
| 6     | ring     | LM | 282  | 283  | 293  | 288  |

|   |      |    |      |      |      |      |
|---|------|----|------|------|------|------|
| 6 | ring | LM | 292  | 283  | 300  | 288  |
| 6 | ring | LM | 292  | 284  | 300  | 314  |
| 6 | ring | LM | 323  | 313  | 333  | 320  |
| 6 | ring | LM | 407  | 392  | 406  | 415  |
| 6 | ring | LM | 426  | 412  | 429  | 440  |
| 6 | ring | LM | 426  | 412  | 429  | 440  |
| 6 | ring | LM | 441  | 428  | 445  | 457  |
| 6 | ring | LM | 450  | 438  | 456  | 469  |
| 6 | ring | LM | 450  | 438  | 456  | 469  |
| 6 | ring | LM | 757  | 727  | 753  | 763  |
| 6 | ring | LM | 776  | 746  | 775  | 789  |
| 6 | ring | LM | 776  | 746  | 775  | 789  |
| 6 | ring | LM | 867  | 840  | 875  | 895  |
| 6 | ring | LM | 867  | 840  | 875  | 895  |
| 6 | ring | LM | 941  | 916  | 952  | 973  |
| 6 | ring | AB | 1665 | 1690 | 1673 | 1606 |
| 6 | ring | AB | 1676 | 1700 | 1685 | 1619 |
| 6 | ring | AB | 1676 | 1700 | 1685 | 1619 |
| 6 | ring | AB | 1701 | 1726 | 1714 | 1651 |
| 6 | ring | AB | 1701 | 1726 | 1714 | 1651 |
| 6 | ring | AB | 1716 | 1742 | 1731 | 1669 |
| 6 | ring | BS | 3440 | 3462 | 3384 | 3161 |
| 6 | ring | BS | 3505 | 3522 | 3455 | 3246 |
| 6 | ring | BS | 3505 | 3522 | 3455 | 3246 |
| 6 | ring | BS | 3554 | 3569 | 3508 | 3311 |
| 6 | ring | BS | 3554 | 3569 | 3508 | 3311 |
| 6 | ring | BS | 3570 | 3584 | 3525 | 3332 |
| 6 | ring | FS | 3901 | 3921 | 3923 | 3768 |
| 6 | ring | FS | 3901 | 3921 | 3924 | 3768 |
| 6 | ring | FS | 3901 | 3921 | 3924 | 3768 |
| 6 | ring | FS | 3901 | 3922 | 3924 | 3769 |
| 6 | ring | FS | 3901 | 3922 | 3924 | 3769 |
| 6 | ring | FS | 3901 | 3922 | 3924 | 3769 |
| 6 | book | LM | 27   | 25   | 24   | 26   |
| 6 | book | LM | 37   | 37   | 38   | 40   |
| 6 | book | LM | 53   | 52   | 52   | 54   |
| 6 | book | LM | 67   | 65   | 62   | 70   |
| 6 | book | LM | 85   | 82   | 80   | 91   |
| 6 | book | LM | 156  | 158  | 170  | 131  |
| 6 | book | LM | 179  | 178  | 190  | 167  |
| 6 | book | LM | 189  | 188  | 198  | 187  |
| 6 | book | LM | 195  | 195  | 207  | 212  |
| 6 | book | LM | 225  | 221  | 238  | 225  |
| 6 | book | LM | 233  | 231  | 249  | 242  |
| 6 | book | LM | 245  | 243  | 259  | 258  |
| 6 | book | LM | 250  | 247  | 262  | 269  |

|       |      |    |      |      |      |      |
|-------|------|----|------|------|------|------|
| 6     | book | LM | 271  | 267  | 268  | 280  |
| 6     | book | LM | 282  | 277  | 297  | 282  |
| 6     | book | LM | 291  | 281  | 298  | 292  |
| 6     | book | LM | 302  | 297  | 314  | 323  |
| 6     | book | LM | 377  | 363  | 379  | 383  |
| 6     | book | LM | 393  | 382  | 402  | 404  |
| 6     | book | LM | 432  | 416  | 432  | 438  |
| 6     | book | LM | 443  | 429  | 447  | 457  |
| 6     | book | LM | 467  | 455  | 474  | 485  |
| 6     | book | LM | 533  | 513  | 535  | 526  |
| 6     | book | LM | 601  | 585  | 603  | 601  |
| 6     | book | LM | 708  | 683  | 705  | 717  |
| 6     | book | LM | 735  | 715  | 737  | 753  |
| 6     | book | LM | 811  | 788  | 818  | 834  |
| 6     | book | LM | 829  | 806  | 832  | 853  |
| 6     | book | LM | 874  | 845  | 875  | 898  |
| 6     | book | LM | 989  | 965  | 1001 | 1020 |
| 6     | book | AB | 1661 | 1687 | 1670 | 1606 |
| 6     | book | AB | 1673 | 1698 | 1684 | 1619 |
| 6     | book | AB | 1675 | 1701 | 1686 | 1624 |
| 6     | book | AB | 1691 | 1716 | 1702 | 1640 |
| 6     | book | AB | 1702 | 1725 | 1711 | 1649 |
| 6     | book | AB | 1730 | 1751 | 1738 | 1674 |
| 6     | book | BS | 3386 | 3407 | 3323 | 3089 |
| 6     | book | BS | 3455 | 3472 | 3402 | 3186 |
| 6     | book | BS | 3503 | 3516 | 3449 | 3232 |
| 6     | book | BS | 3587 | 3601 | 3538 | 3356 |
| 6     | book | BS | 3637 | 3652 | 3598 | 3424 |
| 6     | book | BS | 3651 | 3662 | 3611 | 3439 |
| 6     | book | FS | 3768 | 3780 | 3748 | 3605 |
| 6     | book | FS | 3893 | 3916 | 3920 | 3766 |
| 6     | book | FS | 3898 | 3919 | 3921 | 3766 |
| 6     | book | FS | 3900 | 3920 | 3921 | 3766 |
| 6     | book | FS | 3900 | 3921 | 3922 | 3771 |
| 6     | book | FS | 3903 | 3923 | 3924 | 3773 |
| <hr/> |      |    |      |      |      |      |
| 6     | cage | LM | 42   | 39   | 33   | 42   |
| 6     | cage | LM | 56   | 53   | 47   | 57   |
| 6     | cage | LM | 74   | 72   | 67   | 74   |
| 6     | cage | LM | 100  | 96   | 93   | 95   |
| 6     | cage | LM | 127  | 131  | 145  | 99   |
| 6     | cage | LM | 153  | 157  | 172  | 126  |
| 6     | cage | LM | 185  | 187  | 203  | 163  |
| 6     | cage | LM | 194  | 197  | 215  | 190  |
| 6     | cage | LM | 210  | 206  | 219  | 211  |
| 6     | cage | LM | 223  | 218  | 224  | 213  |
| 6     | cage | LM | 231  | 227  | 233  | 215  |

|   |       |    |      |      |      |      |
|---|-------|----|------|------|------|------|
| 6 | cage  | LM | 234  | 228  | 244  | 233  |
| 6 | cage  | LM | 242  | 235  | 251  | 252  |
| 6 | cage  | LM | 253  | 255  | 261  | 272  |
| 6 | cage  | LM | 281  | 271  | 290  | 286  |
| 6 | cage  | LM | 293  | 288  | 291  | 295  |
| 6 | cage  | LM | 383  | 365  | 373  | 368  |
| 6 | cage  | LM | 395  | 381  | 393  | 397  |
| 6 | cage  | LM | 437  | 422  | 437  | 422  |
| 6 | cage  | LM | 453  | 437  | 454  | 447  |
| 6 | cage  | LM | 467  | 447  | 461  | 461  |
| 6 | cage  | LM | 534  | 517  | 542  | 530  |
| 6 | cage  | LM | 553  | 536  | 558  | 564  |
| 6 | cage  | LM | 620  | 606  | 628  | 616  |
| 6 | cage  | LM | 682  | 665  | 689  | 685  |
| 6 | cage  | LM | 717  | 694  | 716  | 716  |
| 6 | cage  | LM | 774  | 753  | 780  | 797  |
| 6 | cage  | LM | 790  | 767  | 794  | 802  |
| 6 | cage  | LM | 852  | 832  | 864  | 867  |
| 6 | cage  | LM | 975  | 946  | 978  | 998  |
| 6 | cage  | AB | 1666 | 1691 | 1673 | 1611 |
| 6 | cage  | AB | 1673 | 1700 | 1685 | 1627 |
| 6 | cage  | AB | 1684 | 1706 | 1690 | 1630 |
| 6 | cage  | AB | 1698 | 1721 | 1707 | 1645 |
| 6 | cage  | AB | 1707 | 1732 | 1716 | 1655 |
| 6 | cage  | AB | 1722 | 1745 | 1733 | 1669 |
| 6 | cage  | BS | 3324 | 3346 | 3264 | 3037 |
| 6 | cage  | BS | 3517 | 3530 | 3456 | 3272 |
| 6 | cage  | BS | 3556 | 3573 | 3512 | 3334 |
| 6 | cage  | BS | 3604 | 3619 | 3573 | 3368 |
| 6 | cage  | BS | 3650 | 3664 | 3612 | 3424 |
| 6 | cage  | BS | 3718 | 3733 | 3700 | 3561 |
| 6 | cage  | FS | 3757 | 3770 | 3735 | 3593 |
| 6 | cage  | FS | 3792 | 3801 | 3769 | 3639 |
| 6 | cage  | FS | 3895 | 3916 | 3913 | 3763 |
| 6 | cage  | FS | 3896 | 3918 | 3921 | 3771 |
| 6 | cage  | FS | 3899 | 3920 | 3922 | 3771 |
| 6 | cage  | FS | 3908 | 3927 | 3927 | 3776 |
| 6 | prism | LM | 61   | 61   | 58   | 59   |
| 6 | prism | LM | 70   | 67   | 63   | 64   |
| 6 | prism | LM | 74   | 71   | 69   | 74   |
| 6 | prism | LM | 98   | 110  | 125  | 81   |
| 6 | prism | LM | 112  | 123  | 138  | 93   |
| 6 | prism | LM | 149  | 151  | 165  | 126  |
| 6 | prism | LM | 173  | 174  | 188  | 156  |
| 6 | prism | LM | 178  | 178  | 194  | 159  |
| 6 | prism | LM | 212  | 210  | 209  | 192  |

|   |       |    |      |      |      |      |
|---|-------|----|------|------|------|------|
| 6 | prism | LM | 217  | 213  | 230  | 208  |
| 6 | prism | LM | 238  | 232  | 248  | 221  |
| 6 | prism | LM | 246  | 241  | 257  | 227  |
| 6 | prism | LM | 275  | 269  | 272  | 251  |
| 6 | prism | LM | 284  | 274  | 283  | 266  |
| 6 | prism | LM | 287  | 281  | 291  | 279  |
| 6 | prism | LM | 357  | 348  | 360  | 350  |
| 6 | prism | LM | 367  | 355  | 369  | 361  |
| 6 | prism | LM | 420  | 405  | 416  | 415  |
| 6 | prism | LM | 427  | 413  | 429  | 416  |
| 6 | prism | LM | 462  | 448  | 463  | 451  |
| 6 | prism | LM | 491  | 480  | 493  | 472  |
| 6 | prism | LM | 530  | 514  | 529  | 524  |
| 6 | prism | LM | 547  | 535  | 553  | 544  |
| 6 | prism | LM | 612  | 596  | 610  | 613  |
| 6 | prism | LM | 638  | 622  | 644  | 630  |
| 6 | prism | LM | 675  | 657  | 673  | 683  |
| 6 | prism | LM | 711  | 687  | 708  | 723  |
| 6 | prism | LM | 823  | 796  | 821  | 821  |
| 6 | prism | LM | 868  | 844  | 870  | 859  |
| 6 | prism | LM | 1001 | 964  | 992  | 1013 |
| 6 | prism | AB | 1663 | 1687 | 1670 | 1610 |
| 6 | prism | AB | 1674 | 1697 | 1681 | 1621 |
| 6 | prism | AB | 1683 | 1702 | 1685 | 1625 |
| 6 | prism | AB | 1699 | 1724 | 1706 | 1647 |
| 6 | prism | AB | 1716 | 1742 | 1730 | 1664 |
| 6 | prism | AB | 1733 | 1755 | 1744 | 1677 |
| 6 | prism | BS | 3301 | 3334 | 3257 | 3016 |
| 6 | prism | BS | 3509 | 3521 | 3456 | 3308 |
| 6 | prism | BS | 3601 | 3625 | 3569 | 3376 |
| 6 | prism | BS | 3620 | 3638 | 3585 | 3422 |
| 6 | prism | BS | 3717 | 3735 | 3701 | 3554 |
| 6 | prism | BS | 3735 | 3753 | 3723 | 3564 |
| 6 | prism | FS | 3784 | 3794 | 3769 | 3631 |
| 6 | prism | FS | 3799 | 3810 | 3784 | 3650 |
| 6 | prism | FS | 3821 | 3826 | 3805 | 3693 |
| 6 | prism | FS | 3898 | 3918 | 3921 | 3773 |
| 6 | prism | FS | 3899 | 3918 | 3923 | 3774 |
| 6 | prism | FS | 3901 | 3920 | 3924 | 3778 |

**Table S9.** Analysis of the intrinsic errors of the density functionals with respect to CCSD(T) reference values,  $\Delta\omega_{\text{intrinsic}}$ , and estimates of the shifts due to NQE,  $\Delta\omega_{\text{NQE}}$ , in the bonded O-H vibrational frequencies of four different water clusters. The  $\omega_{\text{DFT}}$  were calculated by a harmonic analysis in CP2K using a 25Å side cubic periodic simulation cell, the mTZV2P basis set, and an energy cutoff of 400 Ry. For M06-L-D3, we also do the calculation using a cutoff of  $E_{\text{cut}} = 800$  Ry (light blue shaded column). Units are  $\text{cm}^{-1}$ .

| Cluster Bonded<br>O-H Errors | revPBE-D3                                                                                    | B97M-rV                                                                          | M06-L-D3 | revPBE-D3                                                                                                             | B97M-rV | M06-L-D3 |      |                                        |
|------------------------------|----------------------------------------------------------------------------------------------|----------------------------------------------------------------------------------|----------|-----------------------------------------------------------------------------------------------------------------------|---------|----------|------|----------------------------------------|
|                              | $\Delta\omega_{\text{intrinsic}}^{\text{a}} = \omega_{\text{CCSD(T)}} - \omega_{\text{DFT}}$ |                                                                                  |          | $\Delta\omega_{\text{NQE}}^{\text{b}} = \omega_{\text{exp}} - \omega_{\text{AIMD}} - \Delta\omega_{\text{intrinsic}}$ |         |          |      |                                        |
| Dimer                        | 195                                                                                          | -14                                                                              | 153      | 8                                                                                                                     | -330    | -193     | -350 | -205                                   |
| Trimer                       | 221                                                                                          | -18                                                                              | -112     | 70                                                                                                                    | -282    | -182     | -78  | -260                                   |
| Tetramer                     | 176                                                                                          | 42                                                                               | 112      | 64                                                                                                                    | -206    | -294     | -266 | -218                                   |
| Pentamer                     | 272                                                                                          | 18                                                                               | 103      | 49                                                                                                                    | -394    | -284     | -362 | -248                                   |
| All Clusters                 | -303                                                                                         | $\langle \Delta\omega_{\text{NQE}} \rangle_{\text{clusters}}^{\text{b}}$<br>-238 | -264     | -248                                                                                                                  | 3104    | 3402     | 3331 | Predicted bonded O-H stretch in liquid |

<sup>a</sup> Negative values correspond to blue shifts

<sup>b</sup> Negative values correspond to red shifts upon the treatment of nuclei quantum mechanically. The bonded OH frequencies have been averaged, and the values in the table are calculated using the raw data given in Table S9.

**Table S10.** OH stretch vibrational frequencies of water clusters from the dimer ( $n = 2$ ) to the pentamer ( $n = 5$ ) calculated from AIMD and compared to experiment. The mTZV2P basis and  $E_{\text{cut}}=400$  Ry were used. The modes are separated into bonded O-H stretch (BS) and free-OH stretch (FS). The units are  $\text{cm}^{-1}$ .

| $n$ | MODE | Expt. <sup>19</sup> | B97M-rV | M06-L-D3 | revPBE-D3 |
|-----|------|---------------------|---------|----------|-----------|
| 2   | FS   | 3735                | 3889    | 3948     | 3871      |
| 2   | BS   | 3601                | 3808    | 3798     | 3736      |
| 3   | FS   | 3726                | 3886    | 3919     | 3783      |
| 3   | BS   | 3533                | 3733    | 3723     | 3594      |
| 4   | FS   | 3714                | 3886    | 3922     | 3769      |
| 4   | BS   | 3416                | 3668    | 3570     | 3446      |
| 5   | FS   | 3714                | 3876    | 3922     | 3759      |
| 5   | BS   | 3360                | 3626    | 3619     | 3482      |



**Figure S1.** AIMD simulations in the  $NpT$  ensemble using *revPBE-D3*. (a) Density as a function of time. (b) Probability distributions of the instantaneous pressure from the  $NpT$  simulations.

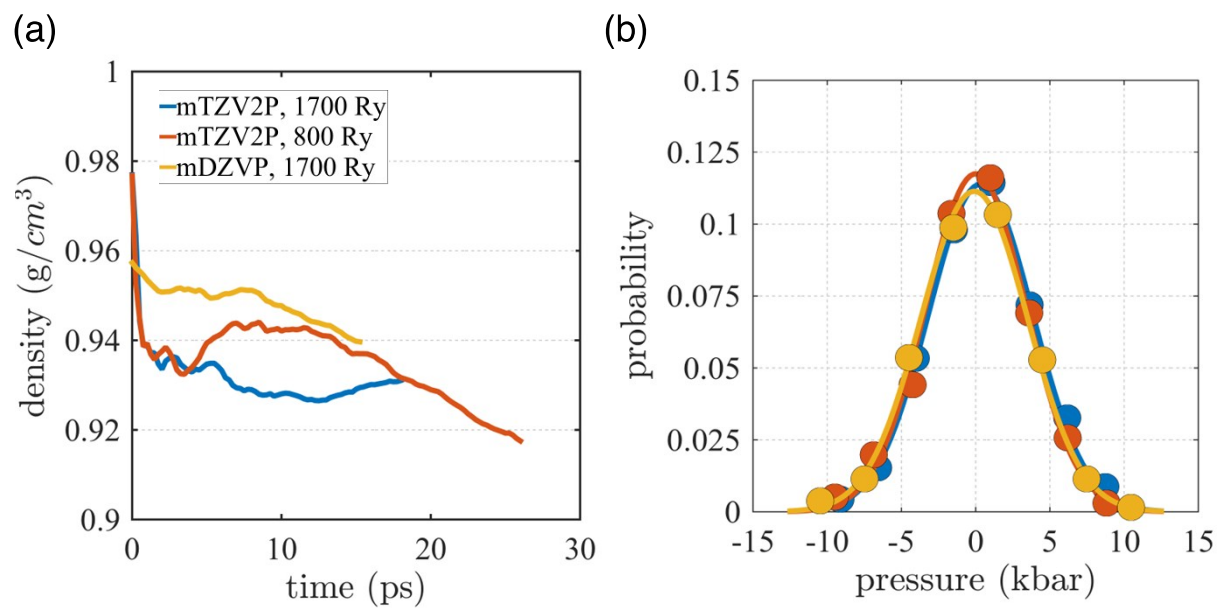

## REFERENCES

1. N. Mardirossian and M. Head-Gordon, *The Journal of Chemical Physics*, 2015, **142**, 074111.
2. Y. Zhao and D. G. Truhlar, *The Journal of Chemical Physics*, 2006, **125**, 194101.
3. M. A. L. Marques, M. J. T. Oliveira and T. Burnus, *Computer Physics Communications*, 2012, **183**, 2272-2281.
4. Y. Shao, Z. Gan, E. Epifanovsky, A. T. B. Gilbert, M. Wormit, J. Kussmann, A. W. Lange, A. Behn, J. Deng, X. Feng, D. Ghosh, M. Goldey, P. R. Horn, L. D. Jacobson, I. Kaliman, R. Z. Khaliullin, T. Kuš, A. Landau, J. Liu, E. I. Proynov, Y. M. Rhee, R. M. Richard, M. A. Rohrdanz, R. P. Steele, E. J. Sundstrom, H. L. Woodcock, P. M. Zimmerman, D. Zuev, B. Albrecht, E. Alguire, B. Austin, G. J. O. Beran, Y. A. Bernard, E. Berquist, K. Brandhorst, K. B. Bravaya, S. T. Brown, D. Casanova, C.-M. Chang, Y. Chen, S. H. Chien, K. D. Closser, D. L. Crittenden, M. Diedenhofen, R. A. DiStasio, H. Do, A. D. Dutoi, R. G. Edgar, S. Fatehi, L. Fusti-Molnar, A. Ghysels, A. Golubeva-Zadorozhnaya, J. Gomes, M. W. D. Hanson-Heine, P. H. P. Harbach, A. W. Hauser, E. G. Hohenstein, Z. C. Holden, T.-C. Jagau, H. Ji, B. Kaduk, K. Khistyayev, J. Kim, J. Kim, R. A. King, P. Klunzinger, D. Kosenkov, T. Kowalczyk, C. M. Krauter, K. U. Lao, A. D. Laurent, K. V. Lawler, S. V. Levchenko, C. Y. Lin, F. Liu, E. Livshits, R. C. Lochan, A. Luenser, P. Manohar, S. F. Manzer, S.-P. Mao, N. Mardirossian, A. V. Marenich, S. A. Maurer, N. J. Mayhall, E. Neuscamman, C. M. Oana, R. Olivares-Amaya, D. P. O'Neill, J. A. Parkhill, T. M. Perrine, R. Peverati, A. Prociuk, D. R. Rehn, E. Rosta, N. J. Russ, S. M. Sharada, S. Sharma, D. W. Small, A. Sodt, T. Stein, D. Stück, Y.-C. Su, A. J. W. Thom, T. Tsuchimochi, V. Vanovschi, L. Vogt, O. Vydrov, T. Wang, M. A. Watson, J. Wenzel, A. White, C. F. Williams, J. Yang, S. Yeganeh, S. R. Yost, Z.-Q. You, I. Y. Zhang, X. Zhang, Y. Zhao, B. R. Brooks, G. K. L. Chan, D. M. Chipman, C. J. Cramer, W. A. Goddard, M. S. Gordon, W. J. Hehre, A. Klamt, H. F. Schaefer, M. W. Schmidt, C. D. Sherrill, D. G. Truhlar, A. Warshel, X. Xu, A. Aspuru-Guzik, R. Baer, A. T. Bell, N. A. Besley, J.-D. Chai, A. Dreuw, B. D. Dunietz, T. R. Furlani, S. R. Gwaltney, C.-P. Hsu, Y. Jung, J. Kong, D. S. Lambrecht, W. Liang, C. Ochsenfeld, V. A. Rassolov, L. V. Slipchenko, J. E. Subotnik, T. Van Voorhis, J. M. Herbert, A. I. Krylov, P. M. W. Gill and M. Head-Gordon, *Molecular Physics*, 2015, **113**, 184-215.
5. P. Jurecka, J. Spöner, J. Cerný and P. Hobza, *Physical Chemistry Chemical Physics*, 2006, **8**, 1985-1993.
6. M. S. Marshall, L. A. Burns and C. D. Sherrill, *The Journal of Chemical Physics*, 2011, **135**, 194102.
7. M. Krack and M. Parrinello, *Physical Chemistry Chemical Physics*, 2000, **2**, 2105-2112.
8. S. Goedecker, M. Teter and J. Hutter, *Physical Review B*, 1996, **54**, 1703-1710.
9. C. Hartwigsen, S. Goedecker and J. Hutter, *Physical Review B*, 1998, **58**, 3641-3662.

10. S. Grimme, J. Antony, S. Ehrlich and H. Krieg, *The Journal of Chemical Physics*, 2010, **132**, 154104.
11. G. S. Fanourgakis, E. Aprà and S. S. Xantheas, *The Journal of Chemical Physics*, 2004, **121**, 2655-2663.
12. O. A. Vydrov and T. Van Voorhis, *The Journal of Chemical Physics*, 2010, **133**, 244103.
13. T. Anacker and J. Friedrich, *Journal of Computational Chemistry*, 2014, **35**, 634-643.
14. M. J. McGrath, J. I. Siepmann, I. F. W. Kuo, C. J. Mundy, J. VandeVondele, J. Hutter, F. Mohamed and M. Krack, *ChemPhysChem*, 2005, **6**, 1894-1901.
15. M. J. McGrath, J. I. Siepmann, I. F. W. Kuo and C. J. Mundy, *Molecular Physics*, 2006, **104**, 3619-3626.
16. G. J. Martyna, D. J. Tobias and M. L. Klein, *The Journal of Chemical Physics*, 1994, **101**, 4177-4189.
17. Z. Ma, Y. Zhang and M. E. Tuckerman, *The Journal of Chemical Physics*, 2012, **137**, 044506.
18. J. C. Howard and G. S. Tschumper, *Journal of Chemical Theory and Computation*, 2015, **11**, 2126-2136.
19. F. Huisken, M. Kaloudis and A. Kulcke, *The Journal of Chemical Physics*, 1996, **104**, 17-25.
